# Supplementary material
Source: PubMed Central journal article supplement (PMC2943283)
Supplement: supp_M110.128868_jbc.M110.128868-1.pdf [file supp_M110.128868_jbc.M110.128868-1.pdf]

**Supplemental Figure 1.** Sar1<sup>D198A</sup>-CFP expression redistributes GalT2 to the ER in CHO-K1 cell. Cells co-expressing Sar1-CFP (a, white) and GalT2 (b, green), and immunostained for the ER marker BiP (c, red); d is the merge of b and c.

**Supplemental Figure 2.** Sar1<sup>D198A</sup> does not affect Bet1 localization in CHO-K1 cells. Cells co-expressing Sar1 wt-CFP (a, white) and GalT2 (b, green), and immunostained for the SNARE Bet1 (c, red); d is the merge of b and c.

# Supplemental Figure 1



## Supplemental Figure 2
